# Supplementary material for: Oxypurinol pharmacokinetics and pharmacodynamics in healthy volunteers: Influence of BCRP Q141K polymorphism and patient characteristics
Source: PubMed Central journal article supplement — Clin Transl Sci. 2021 May 1;14(4):1431–43. doi: 10.1111/cts.12992 (PMC8301548; doi:10.1111/cts.12992), 2021-05-01
Supplement: CTS-14-1431-s001.pdf [file CTS-14-1431-s001.pdf]

## Supplementary Model Code 1: Pharmacokinetic model code

\$PROBLEM OXY 1 comp PK

\$INPUT C ID TIME DV GENDER WT GENOTYPE HT RACE SUA SCR BLQFL EVID  
AMT CMTT MDV

\$DATA Oxypurinol\_NONMEM\_file\_110119.csv IGNORE=@

\$SUBROUTINE ADVAN6 TRANS1 TOL=5

\$MODEL NCOMP=2 ; number of compartments  
COMP=(ABS,DEFDOSE) ; absorption compartment  
COMP=(CENTRAL,DEFOBS) ; plasma central compartment

;ng dose units  
;hr time units  
;ng/mL oxy concentration units

\$PK

;-----PLASMA PK PARAMETERS-----

IF(GENDER.EQ.0) VGENDER = 1 ; [V~GENDER]

IF(GENDER.EQ.1) VGENDER = ( 1 + THETA(6))

VCOV=VGENDER

TVCL = THETA(3) ; typical value of clearance

CL = THETA(3) \* EXP(ETA(1)) ; clearance

TVV = THETA(4) ; typical value of volume

TVV = VCOV\*TVV ; [V~GENDER]

V = TVV \* EXP(ETA(2)) ; volume

TVKA=THETA(5) ; typical value of formation rate constant

KA = TVKA \* EXP(ETA(3)) ; formation rate constant

KE = CL/V ; elimination rate constant from central compartment

F1 = 1 ; oral bioavailability

;-----ODES-----

\$DES

DADT(1) = -KA \* A(1) ; ODE for absorption compartment

DADT(2) = KA \* A(1) - KE \* A(2) ; ODE for plasma central compartment

;-----PREDICTION & ERROR MODEL-----

\$ERROR

IPRED=A(2)/V ; prediction for PK units: ng/mL

WA=THETA(1) ; additive error for PK

WP=THETA(2) ; proportional error for PK

W = SQRT(WA\*\*2+(WP\*IPRED)\*\*2) ; combined error model

IRES=DV-IPRED

IWRES=IRES/W

Y = IPRED + W\*EPS(1)

;-----INITIAL ESTIMATES-----

\$THETA

0.01 FIX ; additive error for PK

0.253467 ; proportional error for PK

1742.83 ; CL (mL/hr)

57013.5 ; V (mL)

0.77117 ; KA (1/hr)

-0.248189 ; [V~GENDER]

\$OMEGA

0.0556119 ; ETA1 (CL)

0.034849 ; ETA2 (V)

0.304355 ; ETA3 (KA)

\$SIGMA

1 FIX

\$ESTIMATION METHOD=1 INTERACTION PRINT=5 SIG=3 MAXEVAL=9999 NOABORT

\$COVARIANCE UNCONDITIONAL

\$TABLE ID TIME IPRED DV GENDER GENOTYPE SCR WRES CWRES EVID CMTT MDV

FILE=sdtab9

NOPRINT ONEHEADER

## Supplementary Model Code 2: Pharmacokinetic-pharmacodynamic model code

\$PROBLEM OXY 1 comp PK PD

\$INPUT C ID TIME DV GENDER WT GENOTYPE HT RACE SUA SCR BLQFL EVID  
AMT CMTT MDV FLAG SCRSUB

\$DATA OXY\_PK\_PD\_022720.csv IGNORE=@

\$SUBROUTINE ADVAN6 TRANS1 TOL=5

\$MODEL NCOMP=2 ; number of compartments  
COMP=(ABS,DEFDOSE) ; absorption compartment  
COMP=(CENTRAL,DEFOBS) ; plasma central compartment

;ng dose units  
;hr time units  
;ng/mL oxy concentration units  
;mg/dL SUA units

\$PK

;-----PLASMA PK PARAMETERS-----

IF(GENDER.EQ.0) VGENDER = 1 ; [V~GENDER]  
IF(GENDER.EQ.1) VGENDER = ( 1 + THETA(6))  
VCOV=VGENDER

TVCL = THETA(3) ; typical value of clearance  
CL = THETA(3) \* EXP(ETA(1)) ; clearance

TVV = THETA(4) ; typical value of volume  
TVV = VCOV\*TVV ; [V~GENDER]  
V = TVV \* EXP(ETA(2)) ; volume

TVKA=THETA(5) ; typical value of formation rate constant  
KA = TVKA \* EXP(ETA(3)) ; formation rate constant

KE = CL/V ; elimination rate constant from central compartment  
F1 = 1 ; oral bioavailability

;-----PKPD PARAMETERS-----

BASESCR = ( 1 + THETA(14))\*(SCR - 0.78) ; [BASE~SCR]

IF(GENOTYPE.EQ.0) BASEGENOTYPE = 1 ; [BASE~GENOTYPE]  
IF(GENOTYPE.EQ.1) BASEGENOTYPE = ( 1 + THETA(12))  
IF(GENOTYPE.EQ.2) BASEGENOTYPE = ( 1 + THETA(13))

BASECOV=BASEGENOTYPE\*BASESCR

TVEMAX = THETA(7) ; typical value of Emax  
EMAX = TVEMAX \* EXP(ETA(4)) ; Emax

TVC50 = THETA(8) ; typical value of C50  
C50 = TVC50 \* EXP(ETA(5)) ; C50

TVBASE = THETA(9) ; typical value of baseline serum uric acid  
TVBASE = BASECOV\*TVBASE ; [BASE~SCR+GENOTYPE]  
BASE = TVBASE \* EXP(ETA(6)) ; baseline serum uric acid

;-----ODES-----

\$DES

DADT(1) = -KA \* A(1) ; ODE for absorption compartment  
DADT(2) = KA \* A(1) - KE \* A(2) ; ODE for plasma central compartment

;-----PREDICTION & ERROR MODEL-----

\$ERROR

CP = A(2)/V  
E = BASE - (EMAX \* CP)/(C50 + CP)  
IPRED=A(2)/V ; prediction for PK units: ng/mL  
IF(FLAG.EQ.3) IPRED = E ; prediction for PD units: mg/dL  
WA=THETA(1) ; additive error for PK  
IF(FLAG.EQ.3) WA = THETA(10) ; additive error for PD  
WP=THETA(2) ; proportional error for PK  
IF(FLAG.EQ.3) WP = THETA(11) ; proportional error for PD

W = SQRT(WA\*\*2+(WP\*IPRED)\*\*2) ; combined error model

IRES=DV-IPRED

IWRES=IRES/W

Y = IPRED + W\*EPS(1)

;-----INITIAL ESTIMATES-----

\$THETA

0.01 FIX ; additive error for PK  
0.253467 FIX ; proportional error for PK

1742.83 FIX ; CL (mL/hr)  
57013.5 FIX ; V (mL)  
0.77117 FIX ; KA (1/hr)  
-0.248189 FIX ; [V~GENDER]  
1 FIX ; EMAX  
(0,2606.22) ; C50 (ng/mL)  
4.36262 ; BASE (mg/dL)  
0 FIX ; additive error for PD  
(0,0.0767211) ; proportional error for PD  
(-1,0.358231,5) ; [BASE~GENOTYPE]  
(-1,0.258194,5) ; [BASE~GENOTYPE]  
(-2.500,0.5096,3.125) ; [BASE~SCR]

\$OMEGA

0.0556119 FIX ; ETA1 (CL)  
0.034849 FIX ; ETA2 (V)  
0.304355 FIX ; ETA3 (KA)  
0 FIX ; ETA4 (EMAX)  
0 FIX ; ETA5 (C50)  
0.0101588 ; ETA6 (BASE)

\$SIGMA

1 FIX

\$ESTIMATION METHOD=1 INTERACTION PRINT=5 SIG=3 MAXEVAL=9999 NOABORT

\$COVARIANCE UNCONDITIONAL

\$STABLE ID TIME IPRED DV GENDER GENOTYPE SCR SCRSUB WRES CWRES EVID CMTT MDV  
FILE=sdtab21  
NOPRINT ONEHEADER
